# Supplementary material
Source: PubMed Central journal article supplement (PMC8259887)
Supplement: NIHMS1710219-supplement-Supplemental_tables.pdf [file NIHMS1710219-supplement-Supplemental_tables.pdf]

## Supporting Information

### Construction of a Virtual Opioid Bioprofile: a Data-driven QSAR Modeling Study to

### Identify New Analgesic Opioids

*Xuelian Jia*<sup>a</sup>, *Heather L. Ciallella*<sup>a</sup>, *Daniel P. Russo*<sup>a</sup>, *Linlin Zhao*<sup>a</sup>, *Morgan H. James*<sup>b,c</sup>, and *Hao Zhu*<sup>a,d\*</sup>

<sup>a</sup> The Rutgers Center for Computational and Integrative Biology, Joint Health Sciences Center, Room 210, 201 S Broadway, Camden, New Jersey, 08103, USA

<sup>b</sup> Department of Psychiatry, Robert Wood Johnson Medical School, Rutgers University and Rutgers Biomedical Health Sciences, Office of the Chairman, 671 Hoes Lane, Piscataway, New Jersey, 08854, USA.

<sup>c</sup> Brain Health Institute, Rutgers University and Rutgers Biomedical and Health Sciences, 683 Hoes Lane West, Office 259A, Piscataway, New Jersey, 08854, USA.

<sup>d</sup> Department of Chemistry, Rutgers University, Science Building, Room 108, 315 Penn St, Camden, New Jersey, 08102, USA

\*Corresponding author:

Hao Zhu:

Telephone: (856) 225-6781

Email: [hao.zhu99@rutgers.edu](mailto:hao.zhu99@rutgers.edu)

Number of pages: 7    Number of tables: 4

**Table S1.** Possible activity cliffs in QSAR model of KOR binding (PubChem AID 410720).

| External Compound<br>& its NN* | Structure                                                                           | Experimental<br>log $K_i$ | Predicted<br>log $K_i$ | Chemical<br>similarity <sup>a</sup> |
|--------------------------------|-------------------------------------------------------------------------------------|---------------------------|------------------------|-------------------------------------|
| Oxycodone<br>(5284603)         | 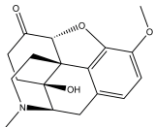   | 2.83 <sup>1</sup>         | 1.22                   | 0.57                                |
| Naloxone<br>(5284596)          |    | 0.08                      | -                      |                                     |
| Morphine<br>(5288826)          |    | 1.53 <sup>2</sup>         | 0.29                   | 0.81                                |
| Nalorphine<br>(5284595)        |   | -0.42                     | -                      |                                     |
| Levallorphan<br>(5359371)      |  | 1.54 <sup>3</sup>         | 0.20                   | 0.58                                |
| Fortral<br>(9669)              |  | 0.48                      | -                      |                                     |

\*NN: chemical nearest neighbor compound in the training set, represented by name and PubChem CID.

<sup>a</sup> Jaccard similarity calculated using FCFP6 descriptors.

**Table S2.** Comparisons between predictions of probe opioids and DrugBank compounds for nine PubChem assays.

| PubChem AID | Mean DrugBank | Mean Probe opioid | t- statistic | p-value   |
|-------------|---------------|-------------------|--------------|-----------|
| 147859      | 0.166         | 0.262             | 16.81        | 5.92e-62  |
| 152239      | 0.207         | 0.677             | 56.12        | 0.0       |
| 273132      | 0.384         | 0.510             | 19.87        | 5.03e-85  |
| 306450      | 0.390         | 0.512             | 26.09        | 8.81e-142 |
| 410720      | 0.290         | 0.413             | 30.43        | 1.68e-188 |
| 445095      | 0.290         | 0.325             | 9.17         | 6.15e-20  |
| 625163      | 0.297         | 0.376             | 19.90        | 3.04e-85  |
| 625217      | 0.272         | 0.477             | 46.99        | 0.0       |
| 625253      | 0.404         | 0.519             | 27.97        | 2.11e-161 |

Range normalized ([0,1]) pActivity (-logActivity) prediction values of 2,042 DrugBank compounds and 3,656 probe opioid compounds were used to perform two-tailed t-test.

**Table S3.** Possible G protein signaling biased MOR ligands prioritized from probe compounds.

| PubChem CID | $P_{bias}^*$ | Structure                                                                           | Source                                     |
|-------------|--------------|-------------------------------------------------------------------------------------|--------------------------------------------|
| 24822630    | 3.46         | 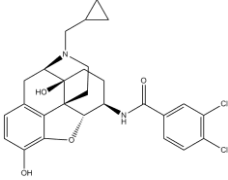   | Literature (Ghirmai et al. <sup>4</sup> )  |
| 51356591    | 3.40         |    | Literature (Zhang et al. <sup>5</sup> )    |
| 56658452    | 3.36         |    | Literature (Yuan et al. <sup>6</sup> )     |
| 89978736    | 3.34         |   | Patents (Goehring et al. <sup>7</sup> )    |
| 16087271    | 3.34         |  | Literature (Rennison et al. <sup>8</sup> ) |

\* $P_{bias}$  = predicted pEC<sub>50</sub> of bioassay AID 779596 – predicted pEC<sub>50</sub> of bioassay AID 779594

pEC<sub>50</sub>: -logEC<sub>50</sub>

**Table S4.** Eight general drugs with potential opioid receptor binding activity.

| DrugBank ID | Name           | Structure                                                                           | Target*                  |
|-------------|----------------|-------------------------------------------------------------------------------------|--------------------------|
| DB00502     | Haloperidol    | 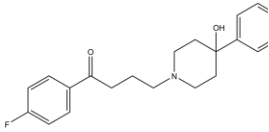   | Dopamine receptor D2     |
| DB00450     | Droperidol     |    | Dopamine receptor D2     |
| DB01100     | Pimozide       |    | Dopamine receptor D2, D3 |
| DB12401     | Bromperidol    |   | Dopamine receptor D2     |
| DB00771     | Clidinium      |  | mAChR: M1                |
| DB00209     | Tropium        |  | mAChR: M1, M3            |
| DB04843     | Mepenzolate    |  | mAChR: M1, M3            |
| DB00986     | Glycopyrronium |  | mAChR: M1-3              |

\*mAChR: Muscarinic acetylcholine receptor.

1. Monory, K.; Greiner, E.; Sartania, N.; Sallai, L.; Pouille, Y.; Schmidhammer, H.; Hanoune, J.; Borsodi, A., Opioid binding profiles of new hydrazone, oxime, carbazone and semicarbazone derivatives of 14-alkoxymorphinans. *Life Sci.* **1999**, *64*, (22), 2011-2020, DOI 10.1016/S0024-3205(99)00148-4.
2. Raynor, K.; Kong, H.; Chen, Y.; Yasuda, K.; Yu, L.; Bell, G. I.; Reisine, T., Pharmacological characterization of the cloned kappa-, delta-, and mu-opioid receptors. *Mol. Pharmacol.* **1994**, *45*, (2), 330-334.
3. Codd, E. E.; Shank, R. P.; Schupsky, J. J.; Raffa, R. B., Serotonin and norepinephrine uptake inhibiting activity of centrally acting analgesics: structural determinants and role in antinociception. *J. Pharmacol. Exp. Ther.* **1995**, *274*, (3), 1263-1270.
4. Ghirmai, S.; Azar, M. R.; Polgar, W. E.; Berzetei-Gurske, I.; Cashman, J. R., Synthesis and biological evaluation of alpha- and beta-6-amido derivatives of 17-cyclopropylmethyl-3,14beta-dihydroxy-4,5alpha-epoxymorphinan: potential alcohol-cessation agents. *J. Med. Chem.* **2008**, *51*, (6), 1913-1924, DOI 10.1021/jm701060e.
5. Zhang, T.; Yan, Z.; Sromek, A.; Knapp, B. I.; Scrimale, T.; Bidlack, J. M.; Neumeyer, J. L., Aminothiazolomorphinans with mixed kappa and mu opioid activity. *J. Med. Chem.* **2011**, *54*, (6), 1903-1913, DOI 10.1021/jm101542c.
6. Yuan, Y.; Elbegdorj, O.; Chen, J.; Akubathini, S. K.; Zhang, F.; Stevens, D. L.; Beletskaya, I. O.; Scoggins, K. L.; Zhang, Z.; Gerk, P. M.; Selley, D. E.; Akbarali, H. I.; Dewey, W. L.; Zhang, Y., Design, synthesis, and biological evaluation of 17-cyclopropylmethyl-3,14beta-dihydroxy-4,5alpha-epoxy-6beta-[(4'-pyridyl)carboxa mido]morphinan derivatives as peripheral selective mu opioid receptor Agents. *J. Med. Chem.* **2012**, *55*, (22), 10118-10129, DOI 10.1021/jm301247n.

7. Goehring, R. R.; Tafesse, L.; Yao, J., Buprenorphine analogs. **2016**, *U.S. Patent No.* 9,382,260.
8. Rennison, D.; Moynihan, H.; Traynor, J. R.; Lewis, J. W.; Husbands, S. M., Structural determinants of opioid activity in derivatives of 14-aminomorphinones: effects of changes to the chain linking of the C14-amino group to the aryl ring. *J. Med. Chem.* **2006**, *49*, (20), 6104-6110, DOI 10.1021/jm060595u.
